# Supplementary material for: Diagnostic Yield of Whole Exome Sequencing in Pediatric Dilated Cardiomyopathy
Source: PubMed Central journal article supplement (PMC5715713; doi:10.3390/jcdd4030011), 2017-08-08
Supplement: jcdd-04-00011-s001.pdf [file jcdd-04-00011-s001.pdf]

## **Supplementary Appendix**

**Table S1.** Primer pairs utilized for Sanger sequencing verification.

| <b>Primer</b>            | <b>Sequence (5'--&gt;3')</b> | <b>Annealing Temperature (°C)</b> |
|--------------------------|------------------------------|-----------------------------------|
| <i>LMNA4</i> E290K F     | TCCACCCCTCCCAGTCACC          | 62                                |
| <i>LMNA4</i> E290K R     | CCCCTTGTCTAACTGAAACCT        |                                   |
| <i>PRDM16</i> 350fs*48 F | CACCACAGCTGAAAACGCTT         | 60                                |
| <i>PRDM16</i> 350fs*48 R | CGGCAGAGATGTCAGAACCT         |                                   |
| <i>RBM20</i> R636S F     | AGAGTTGGGAGTTAAGAGTGTA       | 62                                |
| <i>RBM20</i> R636S R     | GCTGCTGCTTCAGATACTTGT        |                                   |
| <i>TNNT2</i> R131Q F     | GGCACCATTGCTTCAAGACT         | 60                                |
| <i>TNNT2</i> R131Q R     | CTCAAGTGATCTACCCGCCTT        |                                   |

**Table S2.** Genetic causes of DCM.

| Gene   | Inheritance | Allelic Disorders                                                                                                                                                                                                                                                                                | Partners Healthcare Panel | GeneD <sub>x</sub> Panel | Invitae |
|--------|-------------|--------------------------------------------------------------------------------------------------------------------------------------------------------------------------------------------------------------------------------------------------------------------------------------------------|---------------------------|--------------------------|---------|
| ABCC9  | AD          | Atrial fibrillation; hypertrichotic osteochondrodysplasia                                                                                                                                                                                                                                        | X                         | X                        | X       |
| ACTC1  | AD          | Atrial septal defect; hypertrophic/restrictive cardiomyopathy; left ventricular noncompaction                                                                                                                                                                                                    | X                         | X                        | X       |
| ACTN2  | AD          | Hypertrophic cardiomyopathy; left ventricular noncompaction                                                                                                                                                                                                                                      | X                         | X                        | X       |
| ALPK3  | AR          | Hypertrophic cardiomyopathy                                                                                                                                                                                                                                                                      |                           |                          |         |
| ANKRD1 | Unknown     | Hypertrophic cardiomyopathy                                                                                                                                                                                                                                                                      | X                         | X                        | X       |
| BAG3   | AD          | Myofibrillar myopathy                                                                                                                                                                                                                                                                            | X                         | X                        | X       |
| CAV3   | AD          | Long QT syndrome; distal myopathy; limb-girdle muscular dystrophy; rippling muscle disease                                                                                                                                                                                                       | X                         | X                        | X       |
| CHRM2  | AD          | None                                                                                                                                                                                                                                                                                             | X                         |                          | X       |
| CRYAB  | AD/AR       | Cataract; myofibrillar myopathy                                                                                                                                                                                                                                                                  | X                         | X                        | X       |
| CSRP3  | AD          | Hypertrophic cardiomyopathy                                                                                                                                                                                                                                                                      | X                         | X                        | X       |
| DES    | AD/AR       | Limb-girdle muscular dystrophy; myofibrillar myopathy; scapuloperoneal syndrome                                                                                                                                                                                                                  | X                         | X                        | X       |
| DMD    | XL          | Duchenne/Becker muscular dystrophy                                                                                                                                                                                                                                                               | X                         | X                        | X       |
| DOLK   | AR          | Congenital disorder of glycosylation                                                                                                                                                                                                                                                             | X                         |                          | X       |
| DSC2   | AD          | Arrhythmogenic right ventricular dysplasia                                                                                                                                                                                                                                                       | X                         | X                        | X       |
| DSG2   | AD          | Arrhythmogenic right ventricular dysplasia                                                                                                                                                                                                                                                       | X                         | X                        | X       |
| DSP    | AD/AR       | Arrhythmogenic right ventricular dysplasia; Carvajal syndrome; epidermolysis bullosa; keratosis palmoplantaris striata; skin fragility-wooly hair syndrome                                                                                                                                       | X                         | X                        | X       |
| EMD    | XL          | Emery-Dreifuss muscular dystrophy                                                                                                                                                                                                                                                                | X                         | X                        | X       |
| EYA4   | AD          | Sensorineural hearing loss                                                                                                                                                                                                                                                                       |                           |                          | X       |
| FHL2   | Unknown     | None                                                                                                                                                                                                                                                                                             | X                         |                          | X       |
| FKTN   | AR          | Dystroglycanopathy muscular dystrophy                                                                                                                                                                                                                                                            |                           |                          | X       |
| GATAD1 | AR          | None                                                                                                                                                                                                                                                                                             | X                         | X                        | X       |
| ILK    | Unknown     | None                                                                                                                                                                                                                                                                                             | X                         | X                        | X       |
| LAMA4  | Unknown     | None                                                                                                                                                                                                                                                                                             | X                         | X                        | X       |
| LAMP2  | XL          | Danon disease                                                                                                                                                                                                                                                                                    | X                         | X                        | X       |
| LDB3   | AD          | Hypertrophic cardiomyopathy; left ventricular noncompaction; myofibrillar myopathy                                                                                                                                                                                                               | X                         | X                        | X       |
| LMNA   | AD/AR       | Charcot-Marie-Tooth disease; Emery-Dreifuss muscular dystrophy; familial partial lipodystrophy; heart-hand syndrome; Hutchinson-Gilford progeria syndrome, limb-girdle muscular dystrophy; left ventricular noncompaction; Malouf syndrome; Mandibuloacral dysplasia; restrictive cardiomyopathy | X                         | X                        | X       |
| MURC   | AD          | None                                                                                                                                                                                                                                                                                             | X                         |                          |         |
| MYBPC3 | AD          | Hypertrophic cardiomyopathy; left ventricular noncompaction                                                                                                                                                                                                                                      | X                         | X                        | X       |
| MYH6   | AD          | Atrial septal defect; hypertrophic cardiomyopathy                                                                                                                                                                                                                                                | X                         |                          | X       |
| MYH7   | AD          | Hypertrophic/restrictive cardiomyopathy; left ventricular noncompaction; myosin storage myopathy; scapuloperoneal syndrome                                                                                                                                                                       | X                         | X                        | X       |
| MYPN   | AD          | Hypertrophic/restrictive cardiomyopathy                                                                                                                                                                                                                                                          | X                         | X                        | X       |
| NEBL   | Unknown     | Endocardial fibroelastosis                                                                                                                                                                                                                                                                       | X                         | X                        | X       |

**Table S2.** Genetic causes of DCM (continued).

| Gene    | Inheritance | Allelic Disorders                                                                                      | Partners Healthcare Panel | GeneD <sub>x</sub> Panel | Invitae |
|---------|-------------|--------------------------------------------------------------------------------------------------------|---------------------------|--------------------------|---------|
| NEXN    | Unknown     | Hypertrophic cardiomyopathy                                                                            | X                         | X                        | X       |
| PDLIM3  | Unknown     | None                                                                                                   | X                         | X                        | X       |
| PKP2    | AD          | Arrhythmogenic right ventricular dysplasia                                                             | X                         | X                        | X       |
| PLEKHM2 | AR          | Left ventricular noncompaction                                                                         |                           |                          | X       |
| PLN     | AD          | Hypertrophic cardiomyopathy                                                                            | X                         | X                        | X       |
| PRDM16  | AD          | Left ventricular noncompaction                                                                         | X                         |                          | X       |
| PSEN1   | AD          | Alzheimer disease; familial acne inversa; pick disease                                                 |                           |                          |         |
| PSEN2   | Unknown     | Alzheimer disease                                                                                      |                           |                          |         |
| RAF1    | AD          | LEOPARD syndrome; Noonan syndrome                                                                      |                           | X                        | X       |
| RBM20   | AD          | None                                                                                                   | X                         | X                        | X       |
| SCN5A   | AD          | Atrial fibrillation; Brugada syndrome; long QT syndrome; sick sinus syndrome; ventricular fibrillation | X                         | X                        | X       |
| SGCD    | AD/AR       | Limb-girdle muscular dystrophy                                                                         | X                         | X                        | X       |
| SYNE1   | AD          | Emory-Dreifuss muscular dystrophy; spinocerebellar ataxia                                              |                           |                          |         |
| TAZ     | XL          | Barth syndrome                                                                                         | X                         | X                        | X       |
| TCAP    | AR          | Hypertrophic cardiomyopathy; limb-girdle muscular dystrophy                                            | X                         | X                        | X       |
| TNNC1   | AD          | Hypertrophic cardiomyopathy                                                                            | X                         | X                        | X       |
| TNNI3   | AD/AR       | Hypertrophic/restrictive cardiomyopathy                                                                | X                         | X                        | X       |
| TNNI3K  | AD          | Atrial tacharrhythmia; conduction system disease                                                       |                           |                          |         |
| TNNT2   | AD          | Hypertrophic/restrictive; left ventricular noncompaction                                               | X                         | X                        | X       |
| TPM1    | AD          | Hypertrophic cardiomyopathy; left ventricular noncompaction                                            | X                         | X                        | X       |
| TMPO    | Unknown     | None                                                                                                   |                           | X                        | X       |
| TTN     | AD          | Hypertrophic cardiomyopathy; limb-girdle muscular dystrophy; myopathy; tibial muscular dystrophy       | X                         | X                        | X       |
| VCL     | AD          | Hypertrophic cardiomyopathy                                                                            | X                         | X                        | X       |

AD, autosomal dominant; AR, autosomal recessive; XL, X-linked.

**Table S3.** Inherited, non-segregating variants in sporadic DCM.

| Family | Gene Symbol   | Inheritance                | Transcript Variant      | Protein Variant | CADD Score (%ile) | ExAC MAF (Eur) | Gene Ontology               |
|--------|---------------|----------------------------|-------------------------|-----------------|-------------------|----------------|-----------------------------|
| DC-45  | <i>CAV3</i>   | Paternal*                  | c.233C>T NM_033337.2    | p.T78M          | 23.7 (65)         | 0.41%          | Scaffolding protein         |
| DC-62  | <i>LAMA4</i>  | Paternal                   | c.227C>T NM_001105206.2 | p.S76L          | 18.95 (35)        | --             | Extracellular matrix        |
| DC-68  | <i>LDB3</i>   | Paternal*                  | c.493C>T NM_007078.2    | p.R165W         | 10.7 (20)         | 0.01%          | Z-disk                      |
|        | <i>FHL2</i>   | Maternal                   | c.725G>A NM_001450.3    | p.R242Q         | 33 (>95)          | 0.00%          | Protein-protein interaction |
| DC-70  | <i>MYBPC3</i> | Maternal                   | c.2497G>A NM_000256.3   | p.A833T         | 32 (95)           | 0.27%          | Sarcomeric cytoskeleton     |
| DC-79  | <i>SYNE1</i>  | Paternal                   | c.11187G>T NM_182961.3  | p.K3729N        | 21.6 (45)         | 0.62%          | Nuclear membrane            |
|        | <i>MYBPC3</i> | Paternal                   | c.977G>A NM_000256.3    | p.R326Q         | 24 (65)           | 0.85%          | Sarcomeric cytoskeleton     |
| DC-80  | <i>TMEM43</i> | Paternal*                  | c.1061G>C NM_024334.2   | p.C354S         | 22.7 (55)         | 0.08%          | Nuclear membrane            |
|        | <i>ACTC1</i>  | Maternal*                  | c.382A>G NM_005159.4    | p.T128A         | 23.3 (55)         | --             | Sarcomere force generation  |
| DC-92  | <i>PKP2</i>   | Paternal or <i>de novo</i> | c.1592T>G NM_004572.3   | p.I531S         | 25.6 (80)         | 0.77%          | Desmosome                   |
|        | <i>DSC2</i>   | Paternal or <i>de novo</i> | c.1729A>G NM_024422.4   | p.I577V         | <10 (<2)          | 0.06%          | Desmosome                   |
| DC-95  | <i>SCN5A</i>  | Paternal                   | c.488C>T NM_198056.2    | p.T163I         | 20.4 (40)         | --             | Voltage-gated Na channel    |
|        | <i>MYH6</i>   | Paternal                   | c.3010G>T NM_002471.3   | p.A1004S        | 22.9 (50)         | 0.11%          | Sarcomere force generation  |

--, not reported; \*variant is inherited by both affected and unaffected sibling(s); *ACTC1*, actin, alpha, cardiac muscle 1; *CAV3*, caveolin 3; *DSC2*, desmocollin 2; *FHL2*, four and a half LIM domains 2; *LAMA4*, laminin subunit alpha 4; *LDB3*, LIM domain binding 3; *MYBPC3*, myosin binding protein C, cardiac; *MYH6*, myosin heavy chain 6; *PKP2*, plakophilin 2; *SCN5A*, sodium voltage-gated channel alpha subunit 5; *SYNE1*, spectrin repeat containing nuclear envelope protein 1; *TMEM43*, transmembrane protein 43.
